# Supplementary material for: A novel ITGA2B double cytosine frameshift variant (c.1986_1987insCC) leads to Glanzmann's thrombasthenia in a cat
Source: PubMed Central journal article supplement (PMC11099703; doi:10.1111/jvim.17030), 2024-03-01
Supplement: JVIM-38-1408-s001.pdf [file JVIM-38-1408-s001.pdf]

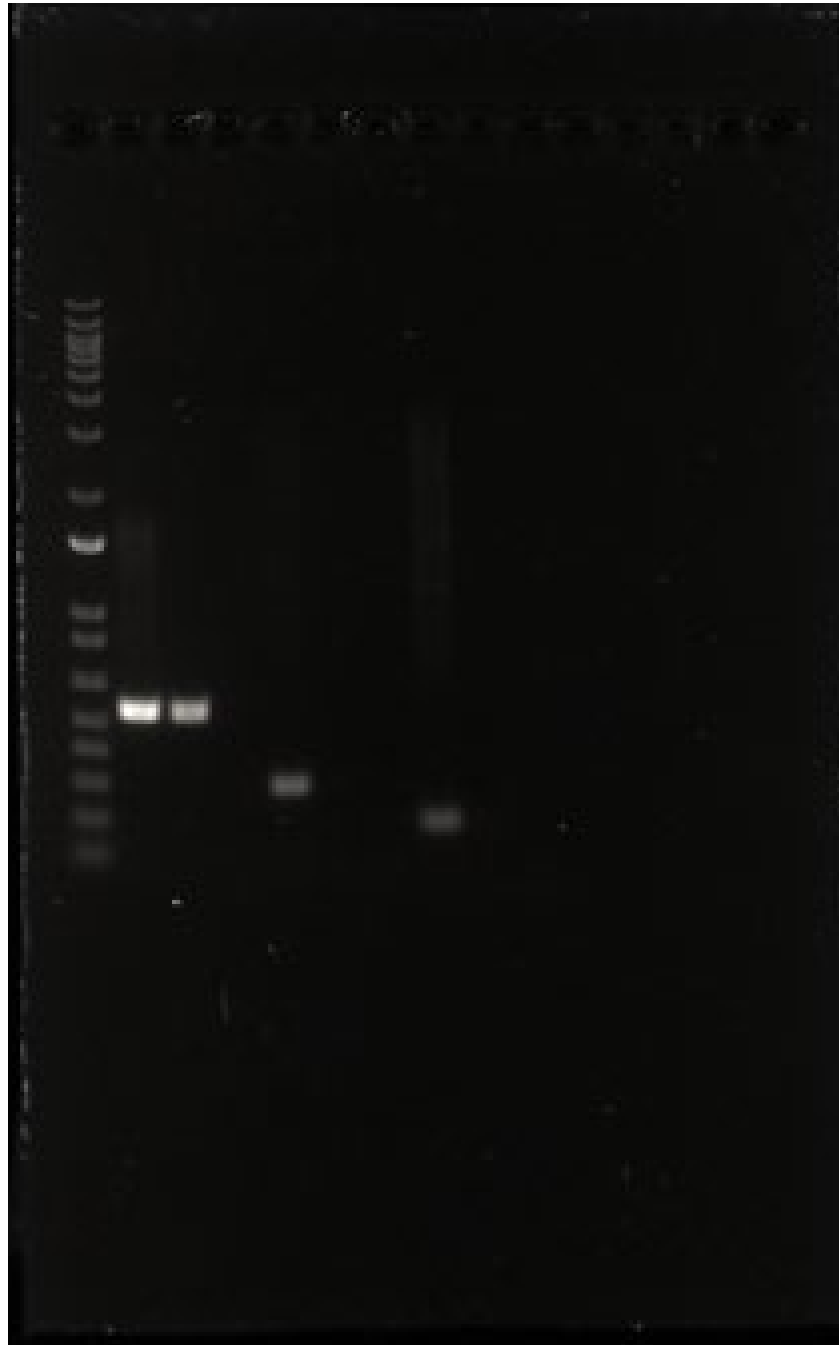

**Supplemental Figure 1. RT-PCR reveals c.1986\_1987insCC leads to complete null *ITGA2B* expression.**

Intact image of ladder (left) and the resulting RT-PCR products are presented. *ACTB* housekeeper amplification was confirmed in a sex- and age-matched clinically healthy cat (lane 1) and affected patient (lane 2) (bands between 650-500 bp marker). *ITGA2B* expression up- and downstream of the variant position (bands between 300-200 bp and 200-100 bp marker, respectively) was detected in the control cat (lane 4 and lane 7, respectively), but not in the affected cat (lane 5 and lane 8, respectively). Negative-control samples for the *ACTB* and 5' and 3' *ITGA2B* RT-PCR reactions are displayed (lane 3, lane 6, and lane 9, respectively).

**Abbreviations:** *ACTB* = beta ( $\beta$ )-actin, bp = base pair, *ITGA2B* = integrin alpha-IIb.
